# Supplementary material
Source: MDPI journal article supplement (https://www.mdpi.com/1999-4915/14/12/2788)
Supplement: s1 [file s1]

[illegible]
