# Supplementary figures and images for: Genomic Epidemiology of SARS-CoV-2 in Western Burkina Faso, West Africa
Source: MDPI journal article supplement (doi:10.3390/v14122788), 2022-12-14

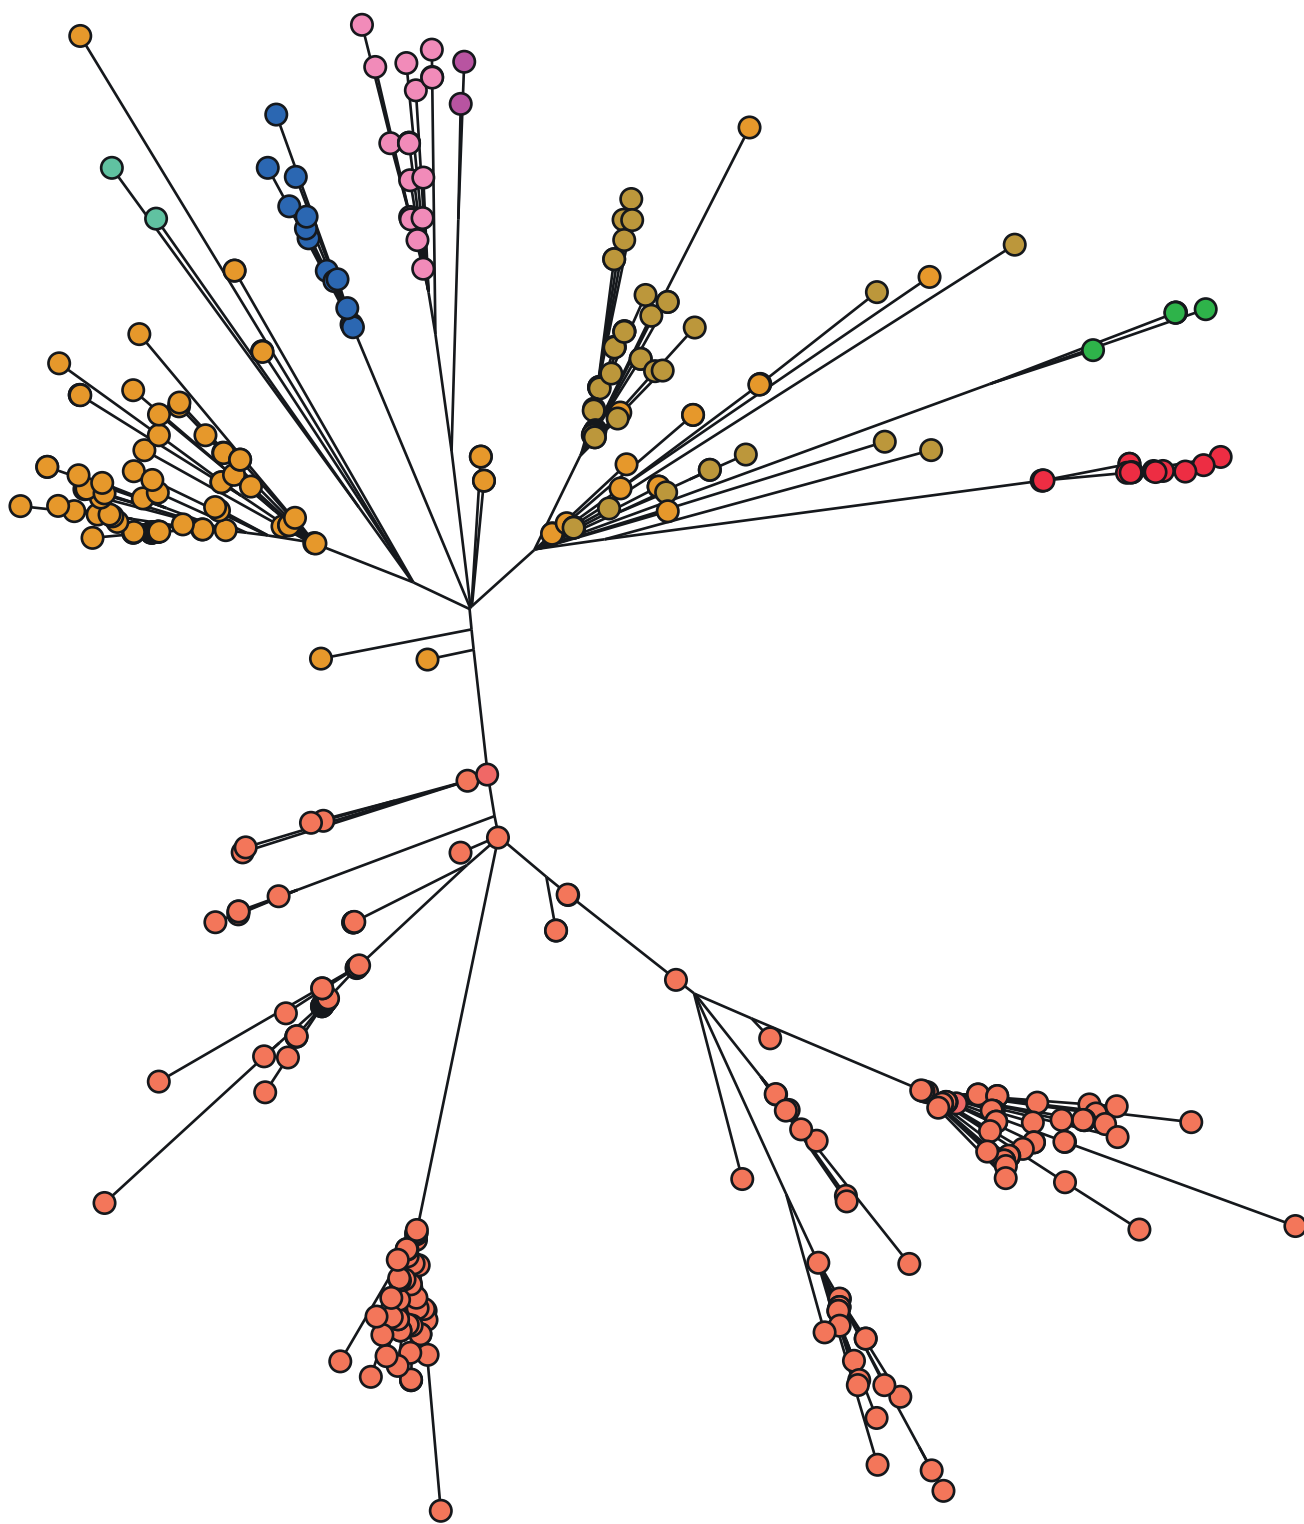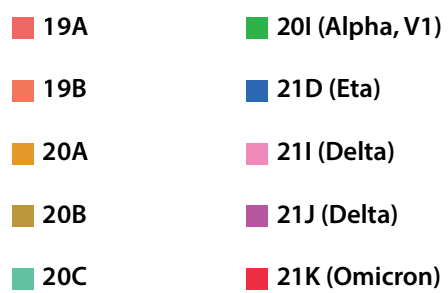

Supplement: s1 [file s1]

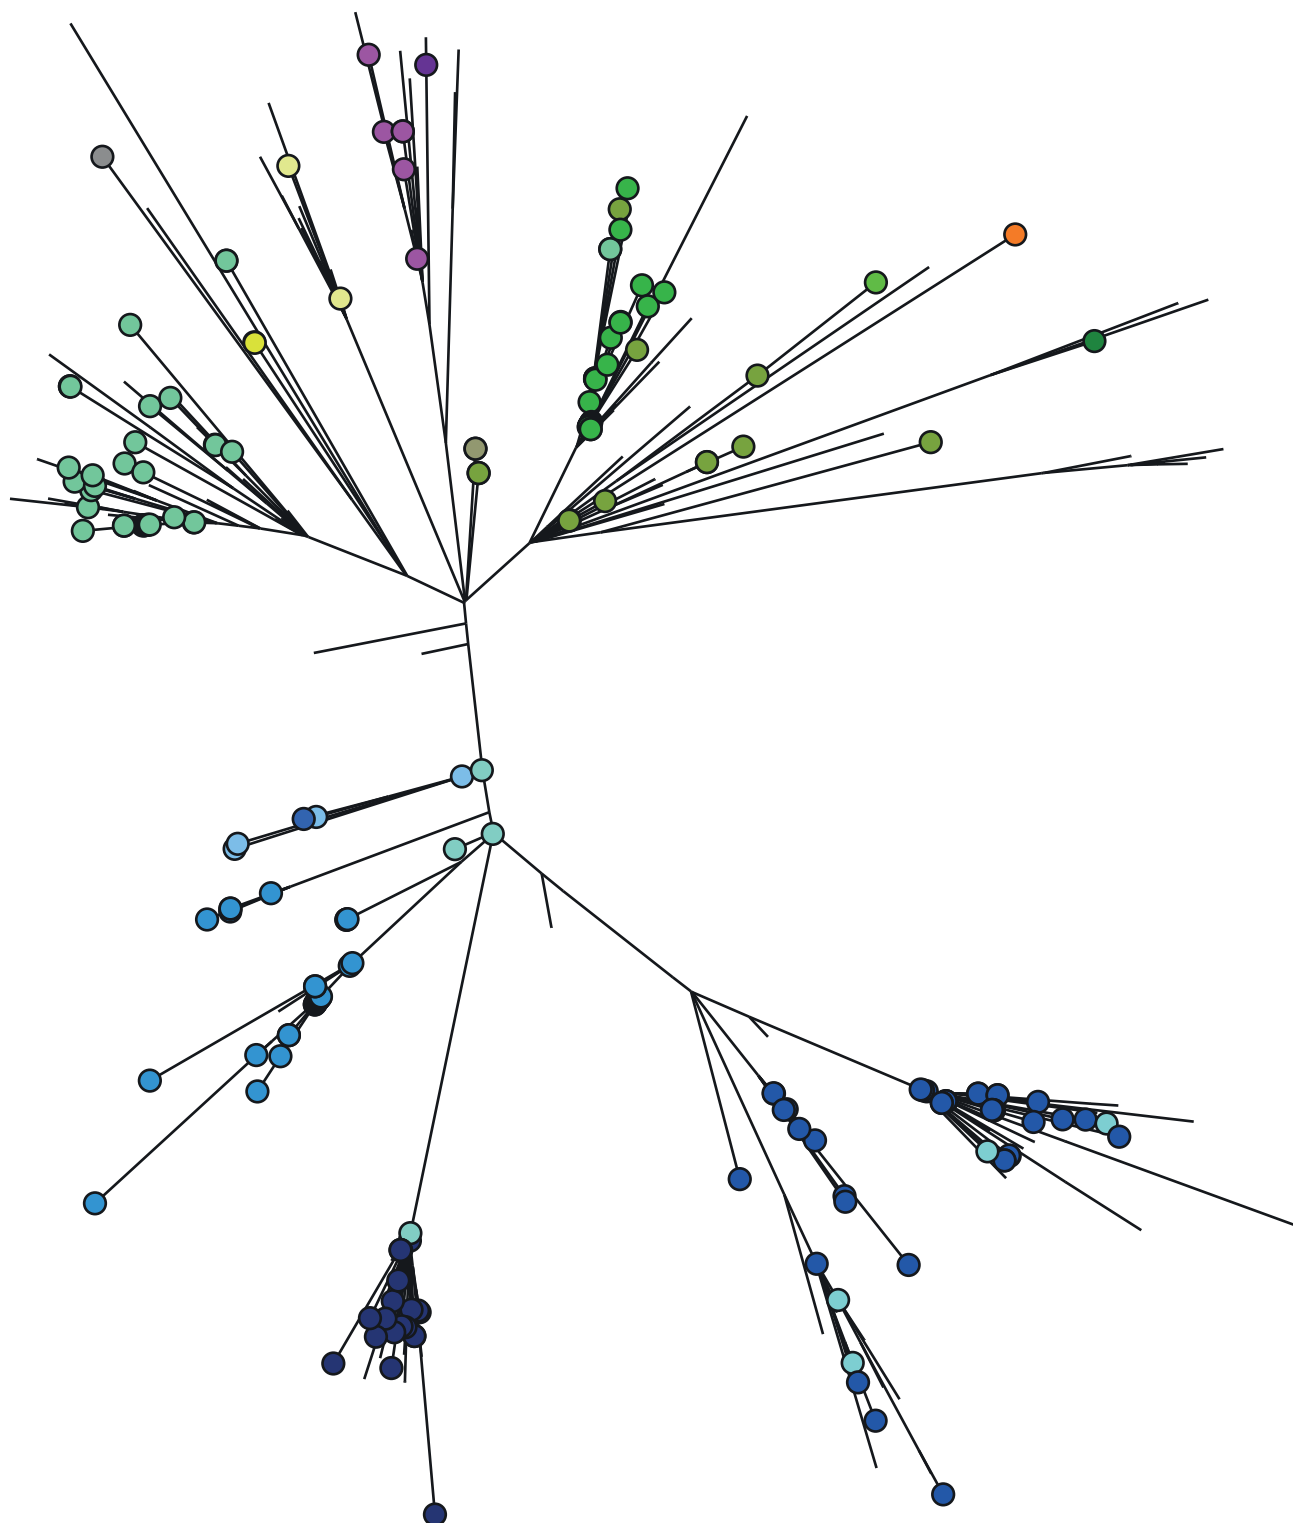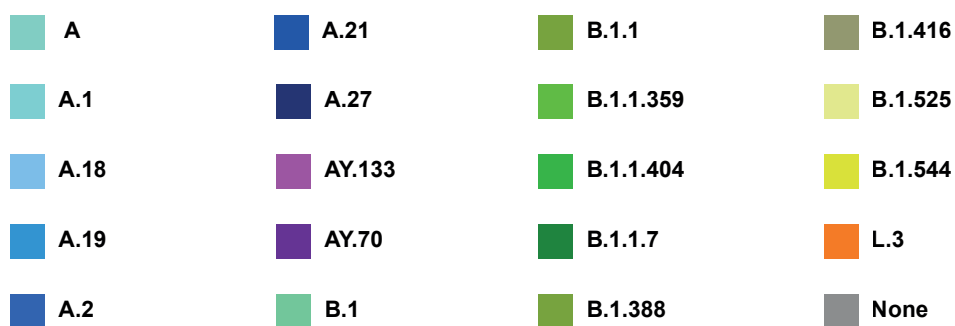

Supplement: s1 [file s1]

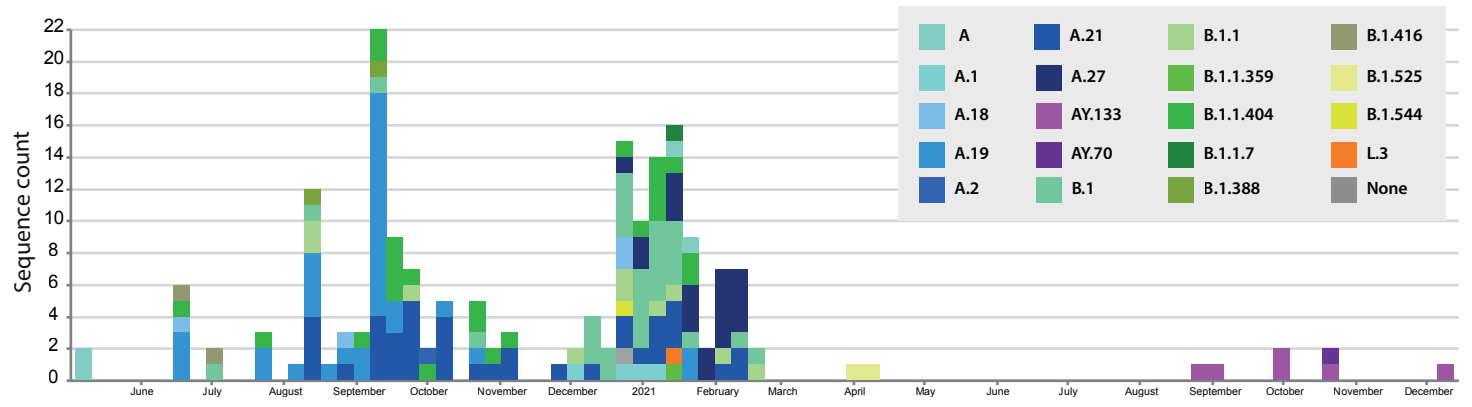

Supplement: s1 [file s1]

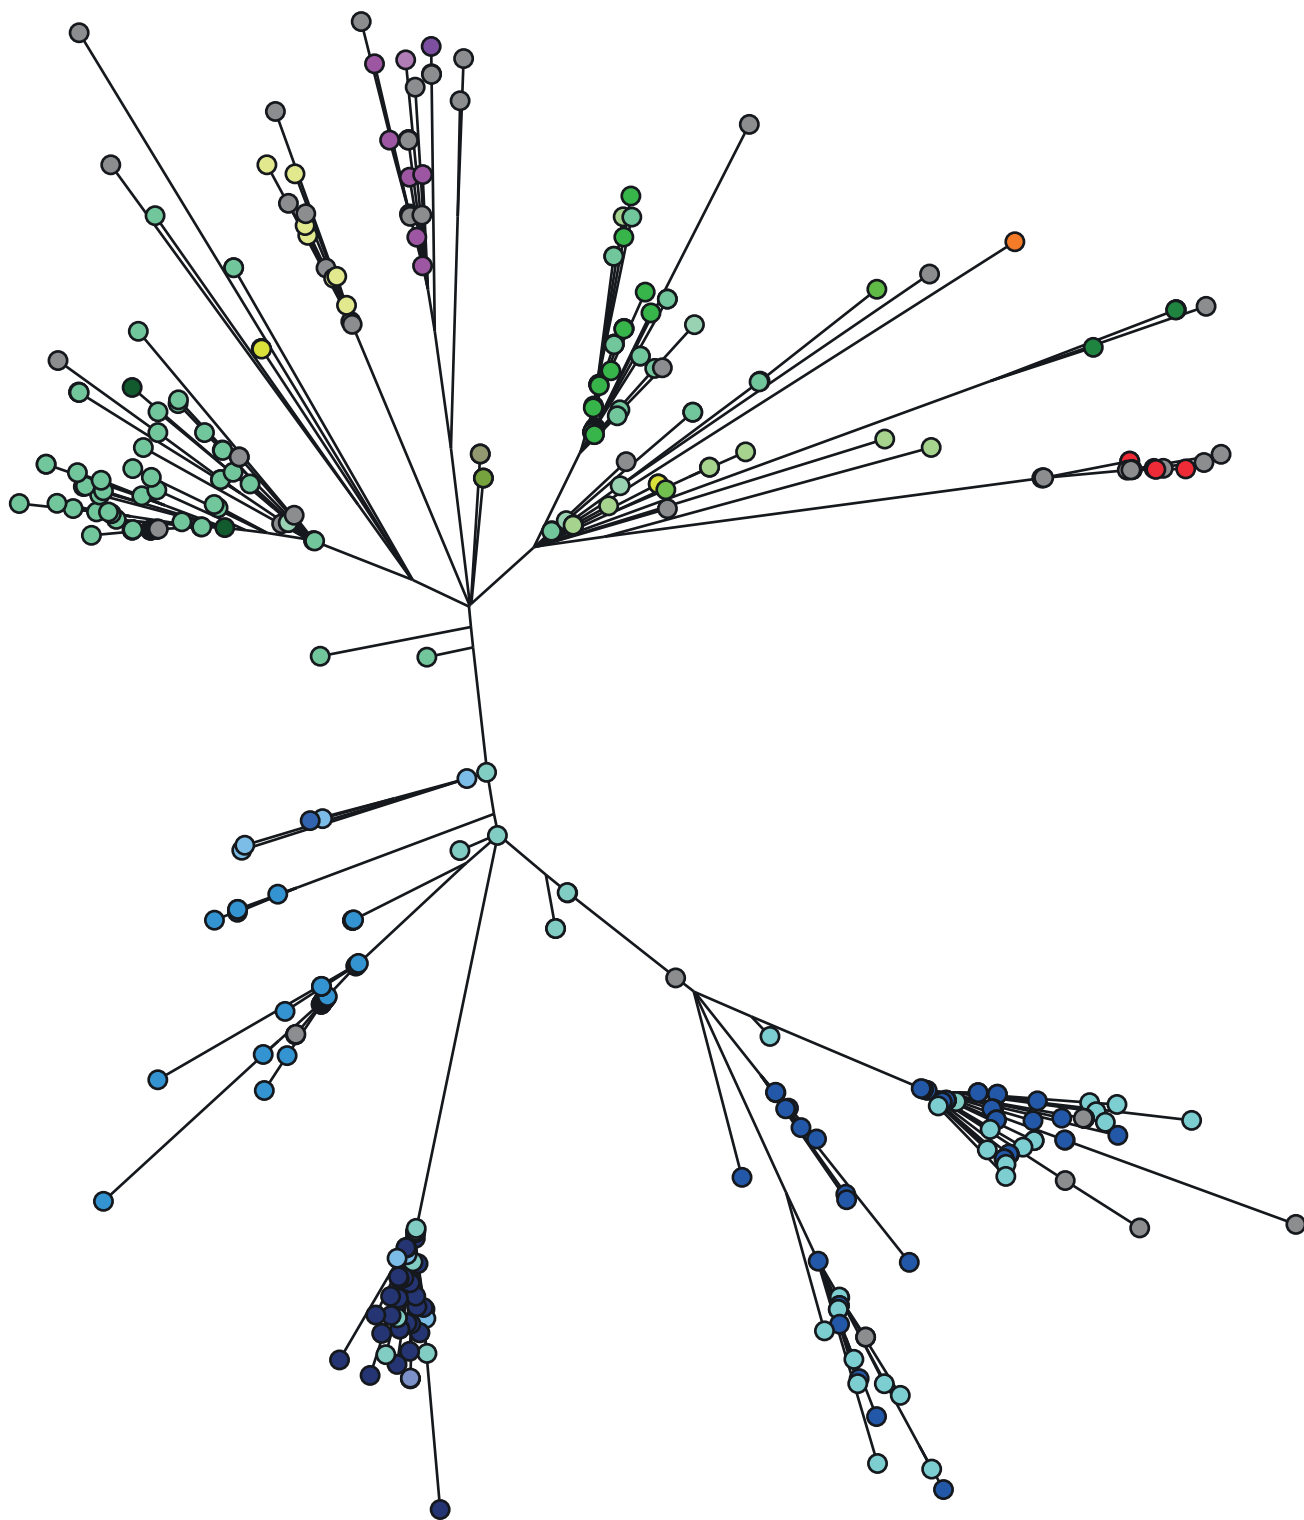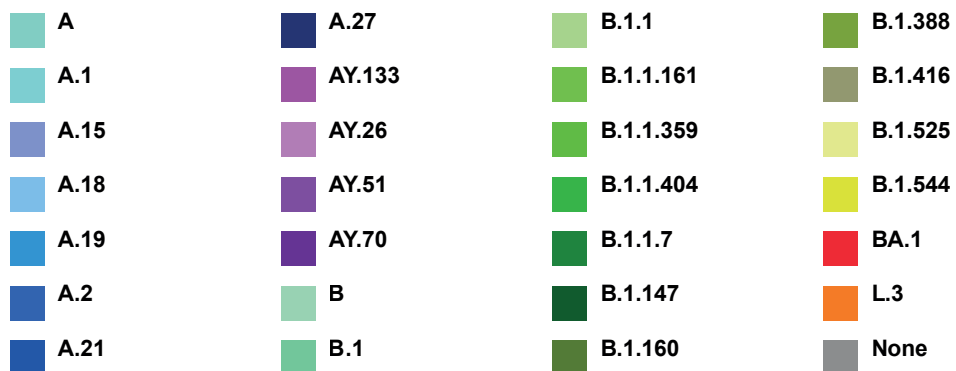

Supplement: s1 [file s1]
